# Supplementary material for: Isophthalonitrile (IPN) hydrogenation over K modified Ni–Co supported catalysts: catalyst characterization and performance evaluation
Source: Royal Society of Chemistry journal article supplement (doi:10.1039/c4ra09607j), 2014-01-01
Supplement: c4ra09607j1.pdf [file c4ra09607j1.pdf]

## Supplementary Information

### **Isophthalonitrile (IPN) Hydrogenation over K modified Ni-Co Supported Catalysts: Catalyst Characterization and Performance Evaluation**

Chang Liu, Tiefeng Wang\*

*Beijing Key Laboratory of Green Reaction Engineering and Technology*

*Department of Chemical Engineering, Tsinghua University, Beijing, 100084, China*

*\*Corresponding author: 86-10-62794132, wangtf@tsinghua.edu.cn*

**Table S1.** Acidity and reaction results of  $w\text{KNiCo/SiO}_2$  and  $\text{NiCo/SiO}_2$ 

| Catalyst                  | Acidity (mmol $\text{NH}_3 \text{ g}^{-1}$ ) | Reaction results <sup>a</sup>                                       |                        |
|---------------------------|----------------------------------------------|---------------------------------------------------------------------|------------------------|
|                           |                                              | $k_r (10^{-2} \text{ mol}^{0.2} \text{ L}^{-0.2} \text{ min}^{-1})$ | $S_{m\text{-XDA}}(\%)$ |
| $\text{SiO}_2^{\text{b}}$ | 0.014                                        | /                                                                   | /                      |
| $\text{NiCo/SiO}_2$       | 0.061                                        | 2.6                                                                 | 45.8                   |
| $0.5\text{NiCo/SiO}_2$    | 0.016                                        | 2.5                                                                 | 60.7                   |
| $1\text{KNiCo/SiO}_2$     | 0.007                                        | 2.7                                                                 | 91.3                   |
| $2\text{KNiCo/SiO}_2$     | 0.007                                        | 0.45                                                                | 91.0                   |

<sup>a</sup> Reaction conditions: 80 °C, 6.0 MPa, 5 g catalyst of 200~400  $\mu\text{m}$ , 80 mL of toluene and 20 mL of methanol as solvent, 2.9 g of IPN feed, 0.086 g of NaOH, 180  $\text{mL min}^{-1}$   $\text{H}_2$  gas flow, and stirring speed of 800 rpm.

<sup>b</sup> The  $\text{SiO}_2$  sample was calcined at 400 °C for 4h before analysis.

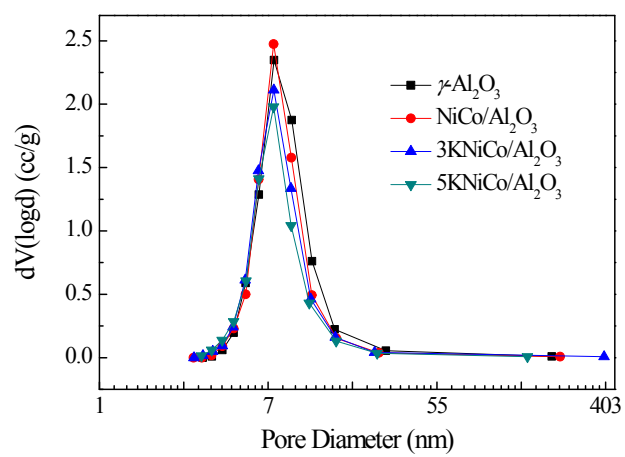

**Fig. S1.** Pore size distribution of  $\gamma\text{-Al}_2\text{O}_3$ , NiCo/Al<sub>2</sub>O<sub>3</sub>, and  $w\text{KNiCo/Al}_2\text{O}_3$  ( $w = 3, 5$ )

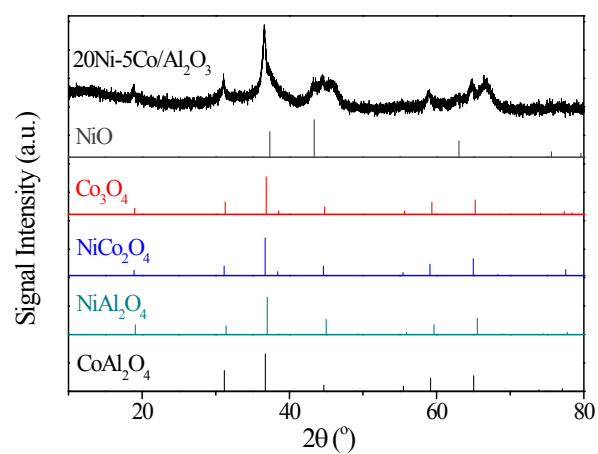

**Fig. S2.** XRD profile of 20Ni-5Co/Al<sub>2</sub>O<sub>3</sub> and the standard spectra of NiO, Co<sub>3</sub>O<sub>4</sub>, NiCo<sub>2</sub>O<sub>4</sub>,

NiAl<sub>2</sub>O<sub>4</sub>, and CoAl<sub>2</sub>O<sub>4</sub>.

The phase analysis was conducted on Jade 6 by matching the XRD profile of the catalyst with the standard spectra in the database.

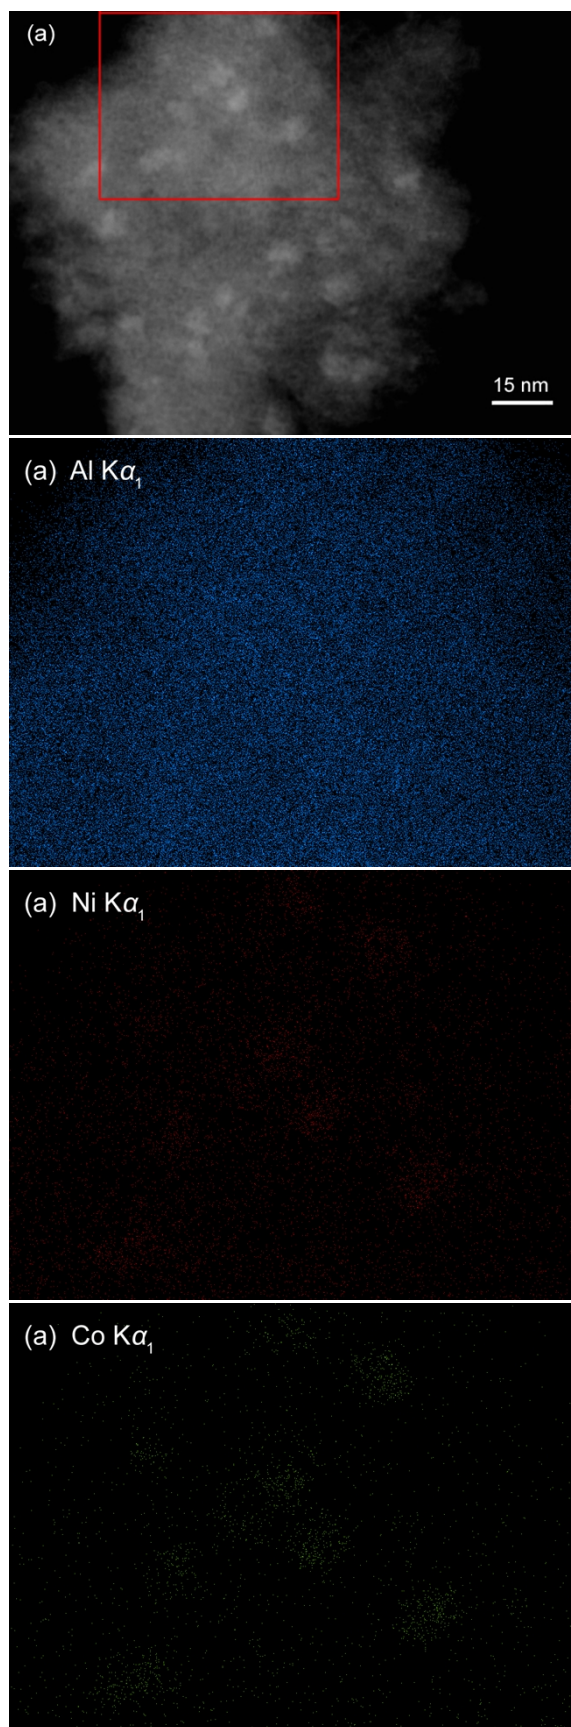

**Fig. S3.** (a) HAADF TEM image (part in the red square was tested by EDS) and EDS surface scanning results of NiCo/Al<sub>2</sub>O<sub>3</sub>

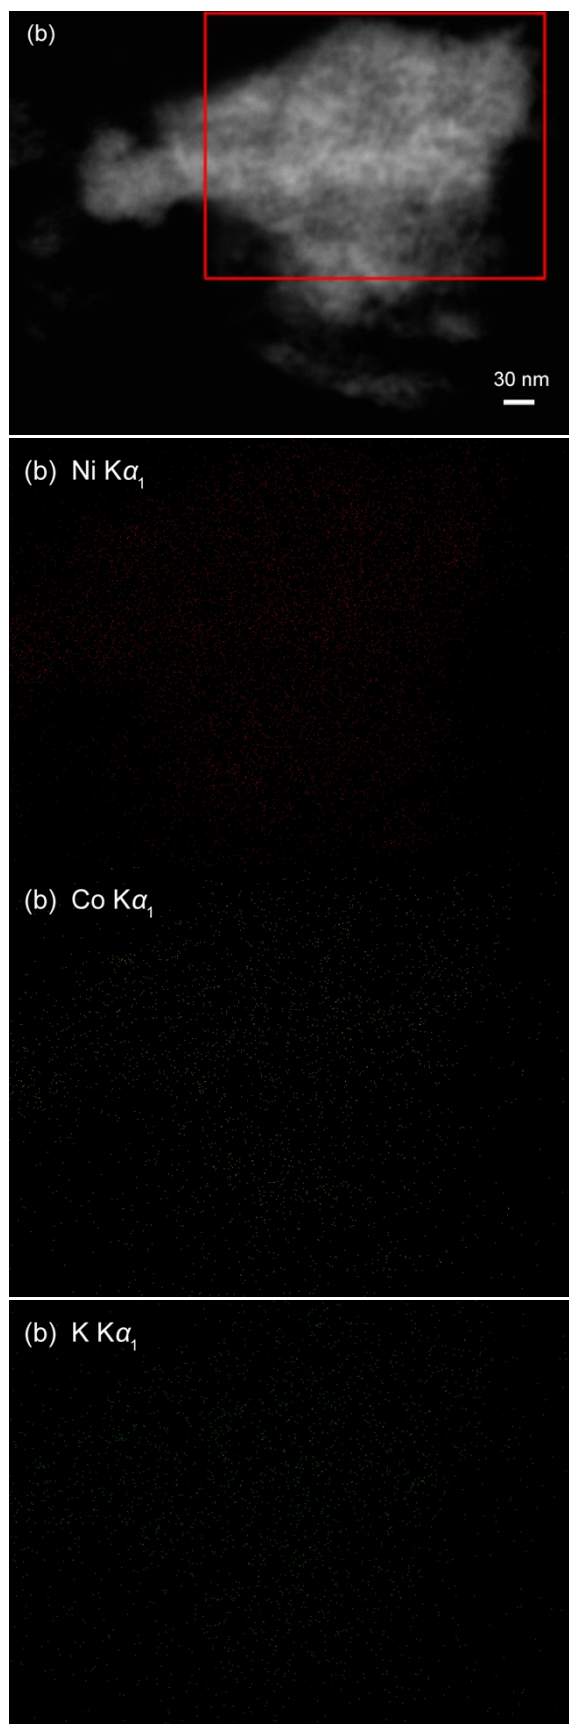

**Fig. S3.** (b) HAADF TEM image (part in the red square was tested by EDS) and EDS surface scanning results of 3KNiCo/Al<sub>2</sub>O<sub>3</sub>

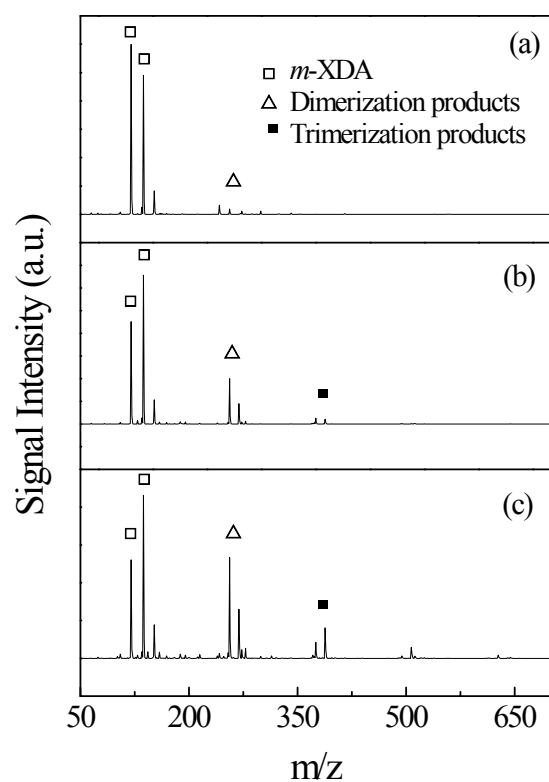

**Fig. S4.** Typical MS spectra of the final liquid samples

(a) product with 99.9% *m*-XDA selectivity (over 3KNiCo/Al<sub>2</sub>O<sub>3</sub>); (b) product with 45.5% *m*-XDA selectivity (over NiCo/Al<sub>2</sub>O<sub>3</sub>); (c) product with 28.5% *m*-XDA selectivity (over another catalyst not included in Table 1)
